# Supplementary material for: In VitroEndothelial Cell Proliferation Assay Reveals Distinct Levels of Proangiogenic Cytokines Characterizing Sera of Healthy Subjects and of Patients with Heart Failure
Source: Hindawi journal article supplement (doi:10.1155/2014/257081), 2014-01-01
Supplement: f1 [file 257081.f1.pdf]

**Supplementary Table 1. Main demographic and clinical characteristics of the HF patients (n=29).**

| Variables                | Values*     |
|--------------------------|-------------|
| NYHA I-II/III-IV (n)     | 12/17       |
| Age (years)              | 72.2±9.6    |
| Male/Female (n)          | 24/5        |
| BMI (kg/m <sup>2</sup> ) | 26.7±4.7    |
| Heart rate (bpm)         | 74.7±18.9   |
| Ischemic aetiology (%)   | 79.3        |
| EDD (mm)                 | 61.8±7.9    |
| EDV (mL)                 | 209±68.3    |
| LVEF (%)                 | 32.2±7.7    |
| NTpro-BNP (pg/ml)        | 134.5±151.0 |
| Risk factors (%):        |             |
| Diabetes                 | 27.6        |
| Hypercholesterolaemia    | 55.2        |
| Smoking habits           | 65.5        |
| History of hypertension  | 91.3        |
| CAD familiarity          | 31          |
| Therapy (%):             |             |
| ACE inhibitors           | 55.2        |
| ARB                      | 34.5        |
| B-blockers               | 82.8        |
| Anti-aldosterone         | 41.4        |
| Diuretics                | 89.7        |
| Digitalis                | 3.4         |
| Nitrates                 | 31          |
| Calcium antagonists      | 6.9         |

\*Values are expressed as either number or means±SD, or percentage (%) as indicated.

NYHA: New York Heart Association; BMI: Body Mass Index; EDD: End-Diastolic Diameter; EDV: End-Diastolic Volume; LVEF: Left Ventricle Ejection Fraction; CAD: Coronary Artery Disease; ACE: Angiotensin-Converting Enzyme; ARB: Angiotensin II-Receptor Blockers.
